# Supplementary material for: Topical Wound-care Products and Their Effects on Healing, Inflammatory Biomarkers, and Growth in Piglets Undergoing Castration
Source: Research Square preprint supplement (doi:10.21203/rs.3.rs-7722871/v1), 2025-10-12
Supplement: Supplementary file 1 [file ee1af170ed5d8d39c47218a1.docx]

# SUPPLEMENTARY MATERIAL

| **Table S1.** Least-squares means (± SEM) of prostaglandin E₂ (PGE₂, pg/mL) concentrations in male piglets by treatment and timepoint. | | | |
| --- | --- | --- | --- |
| **Treatment** | **Timepoint (day)** | | |
| **Day 0** | **Day 7** | **Day 14** |
| Iodine | 133.8 ± 11.8ᵇ | 77.2 ± 7.0ᵃ | 87.5 ± 7.9ᵃ |
| NoCast | 137.8 ± 14.3ᵇ | 78.0 ± 8.0ᵃ | 96.4 ± 10.1ᵃ |
| Oinkment | 135.5 ± 11.9ᶜ | 96.7 ± 8.8ᵇ | 74.7 ± 6.8ᵃ |
| PhytoCare | 135.8 ± 12.1ᵇ | 77.3 ± 7.2ᵃ | 83.3 ± 8.0ᵃ |
| Vetericyn | 143.9 ± 12.9ᵇ | 71.2 ± 6.4ᵃ | 81.2 ± 7.3ᵃ |
| ZincOxide | 126.5 ± 11.2ᵇ | 78.2 ± 7.1ᵃ | 65.5 ± 5.9ᵃ |
| Values are estimated marginal means back transformed from the log scale. Superscript letters (a–c) indicate statistical groupings based on Holm-adjusted *P*-values (α = 0.05) for comparisons among timepoints within each treatment. Means sharing the same letter are not significantly different. | | | |

| **Table S2.** Least-squares means (± SEM) of plasma haptoglobin concentrations (mg/dL) in male piglets by treatment and timepoint. | | | |
| --- | --- | --- | --- |
| **Treatment** | **Timepoint (day)** | | |
| **Day 0** | **Day 7** | **Day 14** |
| Iodine | 30.2 ± 6.0ᵃ | 87.6 ± 18.2ᵇ | 122.8 ± 25.9ᵇ |
| NoCast | 27.5 ± 6.1ᵃ | 57.7 ± 12.5ᵇ | 65.0 ± 14.8ᵇ |
| Oinkment | 29.2 ± 5.8ᵃ | 153.8 ± 31.7ᶜ | 87.5 ± 18.2ᵇ |
| PhytoCare | 29.4 ± 5.9ᵃ | 118.0 ± 24.7ᵇ | 95.1 ± 19.8ᵇ |
| Vetericyn | 30.4 ± 6.2ᵃ | 63.6 ± 12.8ᵇ | 86.6 ± 17.7ᵇ |
| ZincOxide | 27.9 ± 5.6ᵃ | 79.1 ± 16.2ᵇ | 82.6 ± 16.8ᵇ |
| Values are estimated marginal means back transformed from the log scale. Superscript letters (a–c) denote statistical groupings based on Holm-adjusted *P*-values (α = 0.05) for comparisons among timepoints within each treatment. Means sharing the same letter are not significantly different. | | | |
